# Supplementary material for: A Novel Alignment-Free Method for Comparing Transcription Factor Binding Site Motifs
Source: PLoS One. 2010 Jan 20;5(1):e8797. doi: 10.1371/journal.pone.0008797 (PMC2808352; doi:10.1371/journal.pone.0008797)

**Figure S3**. **The motif tree of the 71 non-ZF PFMs in Dataset-1 constructed using MoSta.** The tree is based on the pairwise motif similarity scores calculated by MoSta (Smax score, 0.5 CG content and balanced threshold). Since the Smax scores from MoSta contain both positive and negative values, pairwise distances were calculated using the transformation: . Hierarchical clustering was performed using UPGMA algorithm implemented in PHYLIP.


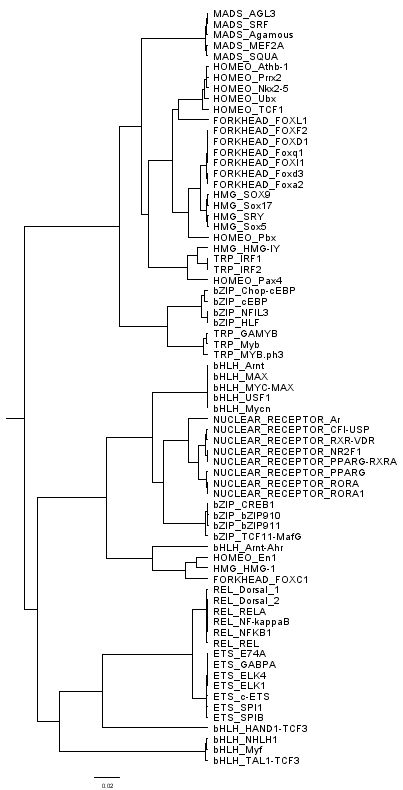

Supplement: Figure S3 — The motif tree of the 71 non-ZF PFMs in Dataset-1 constructed using MoSta. (0.04 MB DOC) [file pone.0008797.s003.doc]
